# Supplementary material for: Productivity, resource efficiency and financial savings: An investigation of the current capabilities and potential of South Australian home food gardens
Source: PubMed Central journal article supplement (PMC7156066; doi:10.1371/journal.pone.0230232), 2020-04-14
Supplement: pone.0230232.s001.pdf [file pone.0230232.s001.pdf]

Supplementary Table 1. A summary of the combined total results from the Edible Gardens project

|                             |                                    |                                                                                                                                   |                                  |                      |                         |               |
|-----------------------------|------------------------------------|-----------------------------------------------------------------------------------------------------------------------------------|----------------------------------|----------------------|-------------------------|---------------|
| No. of gardens              |                                    | 34                                                                                                                                |                                  |                      |                         |               |
| No. of garden areas         |                                    | 93                                                                                                                                |                                  |                      |                         |               |
| Method-crop categories      |                                    | aqua-fivg; bee-hon; bed-orch; other-orch; pot-orch; bed-mixed; pot-mixed; chkn-egg; poult-egg; raised-mixed; bed-vine; wick-mixed |                                  |                      |                         |               |
| Water sources               |                                    | Mains water, rainwater and bore / grey water                                                                                      |                                  |                      |                         |               |
| Irrigation methods          |                                    | Manual (watering can, bucket, sprinkler or hose), drip/spray irrigation lines, automatic irrigation systems or 'other'.           |                                  |                      |                         |               |
|                             |                                    |                                                                                                                                   | <b>Total</b>                     | <b>Min / Max</b>     | <b>Median / Average</b> |               |
| Duration of data collection |                                    | days                                                                                                                              | 7565 (equivalent to 252 months!) | 23 / 880             | 176 / 225               |               |
| Inputs                      | Area under production              | m <sup>2</sup>                                                                                                                    | 3,520.9                          | 4 / 731              | 49 / 98                 | <b>Per m2</b> |
|                             | Estimated setup costs *survey data | \$AUS                                                                                                                             | \$70,195                         | \$0 / \$10,000       | \$1,000 / \$2,005       | \$19.94       |
|                             | Ongoing costs                      | \$AUS                                                                                                                             | \$6,735.72                       | \$0 / \$1,787.50     | \$98.89 / \$198.11      | \$2.13        |
|                             | Time                               | hours                                                                                                                             | 144,582                          | 82 / 36,657          | 1,832 / 4,016           | 41 hours      |
|                             | Applied Irrigation                 | kL                                                                                                                                | 690.8                            | 0.2 / 163.4          | 5.9 / 19.2              | 218L          |
|                             | Recorded Rainfall                  | kL                                                                                                                                | 1231.4                           | 0.16 / 414.3         | 9.8 / 37.3              | 389L          |
| Outputs                     | Total yield                        | kg                                                                                                                                | 3,479                            | 2 / 682              | 32 / 102                | 1.10kg        |
|                             | Inherent energy                    | kJ                                                                                                                                | 5,736,153                        | 1,896 / 1,150,830    | 69,117 / 168,710        | 1815 kJ       |
|                             | Inherent protein                   | g                                                                                                                                 | 77,420                           | 35 / 21,005          | 986 / 2,895             | 30 g protein  |
|                             | Retail value                       | \$AUS                                                                                                                             | \$28,075.61                      | \$38.76 / \$5,433.41 | \$341.83 / \$825.75     | \$8.88        |
|                             | WUE <sub>gross</sub>               | kg/kL                                                                                                                             | -                                | 0.14 / 10.69         | 2.50 / 3.07             | -             |
|                             | WUE <sub>nut</sub>                 | kJ/kL                                                                                                                             | -                                | 132 / 12,486         | 4,400 / 4,583           | -             |
|                             | WUE <sub>fin</sub>                 | AUS\$/kL                                                                                                                          | -                                | 1.83 / 77.48         | 23.84 / 27.37           | -             |
| Retail value of shared food |                                    | \$AUS                                                                                                                             | \$4,246.62                       | \$1.10 / \$1,144.68  | \$27.40 / \$157.28      | -             |
| Recipients of shared food   |                                    | Family; friends; community; swap meet; other                                                                                      |                                  |                      |                         |               |
