# Supplementary material for: Productivity, resource efficiency and financial savings: An investigation of the current capabilities and potential of South Australian home food gardens
Source: PubMed Central journal article supplement (PMC7156066; doi:10.1371/journal.pone.0230232), 2020-04-14
Supplement: pone.0230232.s002.pdf [file pone.0230232.s002.pdf]

Supplementary Table 2. An overview of the five main method-crop categories of the EG project.

| <b>Method-crop name</b>                                         | <b>Acronym</b> | <b>Count of areas</b> | <b>Count of data entries</b> | <b>Total area (m<sup>2</sup>)</b> | <b>Median area (m<sup>2</sup>)</b> |
|-----------------------------------------------------------------|----------------|-----------------------|------------------------------|-----------------------------------|------------------------------------|
| In-ground bed - fruit from an orchard (fruit trees)             | Bed-orch       | 20                    | 552                          | 1709                              | 12                                 |
| In-ground bed - vegetables/vegetables and herbs / herbs / other | Bed-mixed      | 21                    | 1648                         | 553                               | 15                                 |
| Chicken run - eggs                                              | Chkn-egg       | 15                    | 2261                         | 392                               | 10                                 |
| Raised bed - vegetables/vegetables and herbs / herbs/other      | Raised-mixed   | 17                    | 2380                         | 288                               | 12                                 |
| Wicking bed - vegetables, vegetables and herbs / herbs/other    | Wick- mixed    | 9                     | 938                          | 82.0                              | 5                                  |
