# Supplementary material for: Productivity, resource efficiency and financial savings: An investigation of the current capabilities and potential of South Australian home food gardens
Source: PubMed Central journal article supplement (PMC7156066; doi:10.1371/journal.pone.0230232), 2020-04-14
Supplement: pone.0230232.s003.pdf [file pone.0230232.s003.pdf]

Supplementary Table 3. The labour invested in each garden activity per square metre per 30 days for the five main method-crop categories.

| <b>Activity</b>      | <b>Bed-orch</b> | <b>Bed-mixed</b> | <b>Chkn-egg</b> | <b>Raised-mixed</b> | <b>Wick- mixed</b> |
|----------------------|-----------------|------------------|-----------------|---------------------|--------------------|
| Watering (Mains)     | 0.18            | 0.08             | 0.08            | 0.17                | 0.17               |
| Watering (Rainwater) | 0.25            | 0.08             | 0.19            | 0.20                | 0.25               |
| Watering (Bore/Grey) | 0.17            | 0.17             | -               | 0.08                | -                  |
| Plant/Sowing         | 0.38            | 0.50             | -               | 0.50                | 0.50               |
| Harvesting           | 0.08            | 0.08             | 0.08            | 0.08                | 0.03               |
| Livestock Care       | -               | -                | 0.17            | -                   | -                  |
| Weeding/Pruning      | 1.26            | 0.50             | -               | 0.33                | 0.33               |
| Pest Control         | 0.42            | 0.25             | 0.21            | 1.00                | 0.33               |
| Soil Prep/Mulch      | 0.42            | 0.83             | 4.00            | 0.75                | 0.75               |
| Sharing Produce      | 0.08            | 0.17             | 0.17            | 0.08                | 0.08               |
| Fertilizing          | 1.04            | 0.29             | -               | 0.33                | 0.10               |
| Building             | 1.25            | 0.33             | 0.42            | 2.00                | 2.00               |
| Other                | 1.00            | 0.33             | 0.17            | 0.96                | 0.50               |
