# Supplementary material for: Productivity, resource efficiency and financial savings: An investigation of the current capabilities and potential of South Australian home food gardens
Source: PubMed Central journal article supplement (PMC7156066; doi:10.1371/journal.pone.0230232), 2020-04-14
Supplement: pone.0230232.s004.pdf [file pone.0230232.s004.pdf]

Supplementary Table 4. A complete list of reported crops and their harvest weights during the Edible Gardens project. The list is divided by crop category.

|                 | <b>Crop Name</b>              | <b>Total harvest weight (kg)</b> |                    | <b>Crop Name</b>            | <b>Total harvest weight (kg)</b> |
|-----------------|-------------------------------|----------------------------------|--------------------|-----------------------------|----------------------------------|
| Fruits and Nuts | Apple (All kinds)             | 128.6                            | Vegetables         | Artichoke                   | 0.5                              |
|                 | Apricot                       | 71.0                             |                    | Asparagus                   | 13.1                             |
|                 | Bananas                       | 27.3                             |                    | Bean, Green                 | 47.0                             |
|                 | Berries (Mixed or undefined)  | 0.2                              |                    | Beetroot                    | 25.8                             |
|                 | Blackberry                    | 0.4                              |                    | Bok choy or Pak choy        | 7.0                              |
|                 | Blueberry                     | 0.9                              |                    | Broad bean                  | 24.0                             |
|                 | Cherry                        | 0.6                              |                    | Broccoli                    | 35.5                             |
|                 | Fig                           | 31.9                             |                    | Brussel sprouts             | 2.4                              |
|                 | Fruit (Mixed or undefined)    | 9.7                              |                    | Cabbage                     | 2.0                              |
|                 | Grapefruit                    | 25.1                             |                    | Cabbage, Chinese            | 19.3                             |
|                 | Grapes (Green, red and other) | 12.6                             |                    | Capsicum (Red and green)    | 48.3                             |
|                 | Lemon                         | 56.8                             |                    | Carrot                      | 140.9                            |
|                 | Lime                          | 3.7                              |                    | Cauliflower                 | 2.7                              |
|                 | Loquat                        | 0.6                              |                    | Celery                      | 5.7                              |
|                 | Macadamias                    | 0.2                              |                    | Chillies                    | 12.3                             |
|                 | Mandarin, imperial            | 8.7                              |                    | Cucumber (All kinds)        | 121.3                            |
|                 | Melon, rockmelon              | 19.2                             |                    | Eggplant                    | 56.5                             |
|                 | Melon, watermelon             | 7.8                              |                    | Fennel                      | 0.6                              |
|                 | Mulberries                    | 25.9                             |                    | Garlic                      | 20.1                             |
|                 | Nectarine                     | 71.4                             |                    | Greens (Mixed or undefined) | 16.7                             |
|                 | Orange (All kinds)            | 96.1                             |                    | Jalapeno                    | 0.8                              |
|                 | Passionfruit                  | 0.2                              |                    | Kale                        | 6.8                              |
|                 | Peach                         | 93.0                             |                    | Leek                        | 5.1                              |
|                 | Pear (All kinds)              | 135.9                            |                    | Lettuce (All kinds)         | 30.7                             |
|                 | Pepino                        | 0.3                              |                    | Olives                      | 1.6                              |
|                 | Plum                          | 36.8                             |                    | Onion (All kinds)           | 51.1                             |
|                 | Pomegranate                   | 3.8                              |                    | Parsnip                     | 11.1                             |
|                 | Quince                        | 25.9                             |                    | Peas                        | 7.6                              |
|                 | Raspberry                     | 0.3                              |                    | Potato (All kinds)          | 65.1                             |
|                 | Rhubarb, stalk                | 31.5                             |                    | Pumpkin (All kinds)         | 193.0                            |
| Strawberry      | 30.8                          | Radishes                         | 3.7                |                             |                                  |
| Herbs           | Basil                         | 10.9                             | Rainbow chard      | 2.2                         |                                  |
|                 | Bay leaves                    | 0.1                              | Rocket             | 1.9                         |                                  |
|                 | Chives                        | 0.6                              | Silverbeet         | 14.8                        |                                  |
|                 | Coriander                     | 2.4                              | Snow peas          | 1.2                         |                                  |
|                 | Dill                          | 0.3                              | Spring onion       | 9.0                         |                                  |
|                 | Herbs (Mixed or undefined)    | 5.4                              | Spinach, english   | 52.3                        |                                  |
|                 | Mint (All kinds)              | 2.5                              | Sprouts            | 0.1                         |                                  |
|                 | Oregano                       | 1.2                              | Sweet corn         | 55.0                        |                                  |
|                 | Parsley                       | 11.5                             | Sweet potato       | 2.8                         |                                  |
|                 | Rosemary                      | 0.5                              | Tomato (All kinds) | 419.1                       |                                  |
|                 | Tarragon                      | 0.2                              | Turnip             | 1.1                         |                                  |

|                         |                    |       |           |                                 |       |
|-------------------------|--------------------|-------|-----------|---------------------------------|-------|
|                         | Thyme              | 0.6   |           | Vegetables (Mixed or undefined) | 48.0  |
| Animal Products         | Eggs, chicken      | 413.7 |           | Zucchini                        | 343.9 |
|                         | Eggs, duck         | 7.6   |           |                                 |       |
|                         | Fish, silver perch | 0.9   |           |                                 |       |
|                         | Honey              | 4.3   |           |                                 |       |
|                         | Honeycomb          | 0.5   |           |                                 |       |
| Total harvested weight: |                    |       | 3349.5 kg |                                 |       |
