# Supplementary material for: Productivity, resource efficiency and financial savings: An investigation of the current capabilities and potential of South Australian home food gardens
Source: PubMed Central journal article supplement (PMC7156066; doi:10.1371/journal.pone.0230232), 2020-04-14
Supplement: pone.0230232.s005.pdf [file pone.0230232.s005.pdf]

Supplementary Table 5. A breakdown of the calculated setup costs for each method-crop category, including details and assumptions.

| <b>Method-crop category: Bed-orch</b>     |                                                                                                                                                                                                                                                                                                                                                                                                                                                                                                                    |
|-------------------------------------------|--------------------------------------------------------------------------------------------------------------------------------------------------------------------------------------------------------------------------------------------------------------------------------------------------------------------------------------------------------------------------------------------------------------------------------------------------------------------------------------------------------------------|
| Details                                   | The combined average setup cost for bed-orch areas was \$22.73 per square metre, as based on participant costing (Average of \$23.58/m <sup>2</sup> ) and the calculated retail cost of parts at \$18.50/m <sup>2</sup> .                                                                                                                                                                                                                                                                                          |
| Assump.                                   | For the retail cost it was assumed that there would be one young fruit tree (\$35 - \$70 each) planted per 4m <sup>2</sup> , with two bags of soil or compost (\$5 - \$13 per bag) to plant each tree, and some mulch around the base (1/4 of bale of peastraw per tree at \$10 - \$17 per bale). Potential range per square metre: \$11.90 - \$25.10 (average of \$18.50).                                                                                                                                        |
| <b>Method-crop category: Bed-mixed</b>    |                                                                                                                                                                                                                                                                                                                                                                                                                                                                                                                    |
| Details                                   | The combined average setup cost for bed-mixed areas was \$18.91 per square metre, as based on participant costing (Average of \$18.48/m <sup>2</sup> ) and the calculated retail cost of parts at \$19.75/m <sup>2</sup> .                                                                                                                                                                                                                                                                                         |
| Assump.                                   | For the retail cost it was assumed that per square metre 2 - 3 punnets of vegetable and/or herb seedlings can fit (\$2.50 - \$5.50 per punnet) and adding at least one bag of compost or good soil (\$5 - \$13 per bag). Any additional mulch, stakes, fertiliser, or growing from seed instead of seedlings is not accounted for.                                                                                                                                                                                 |
| <b>Method-crop category: Chkn-egg</b>     |                                                                                                                                                                                                                                                                                                                                                                                                                                                                                                                    |
| Details                                   | The combined average setup cost for chkn-egg areas was \$121.46 per square metre, as based on participant costing (Average of \$135.20/m <sup>2</sup> ) and the calculated retail cost of parts at \$52.75/m <sup>2</sup> .                                                                                                                                                                                                                                                                                        |
| Assump.                                   | The retail cost assumed a median sized chicken run of 10m <sup>2</sup> (as based on EG data). The cost of a (relatively simple) chicken coop (\$239 - \$400), with one bale of hay to fill it (\$8.95), a feeder and water dripper (\$40 - \$90 for both), one bag of food to start (\$19 - \$27 per bag), shell-grit (\$14 per bag) and at least two rolls of chicken wire (\$18.48 each). Also assumes at least three hens (\$20 each). Total range per m <sup>2</sup> : \$41.80 - \$63.70 (average of \$52.75). |
| <b>Method-crop category: Raised-mixed</b> |                                                                                                                                                                                                                                                                                                                                                                                                                                                                                                                    |
| Details                                   | The combined average setup cost for raised-mixed areas was \$106.09 per square metre, as based on participant costing (Average of \$107.84/m <sup>2</sup> ) and the calculated retail cost of parts at \$99.10/m <sup>2</sup> .                                                                                                                                                                                                                                                                                    |
| Assump.                                   | The retail cost assumed raised bed frames (\$44.97 - \$385) filled with compost or soil (\$30 - \$192), with two punnets of vegetable or herb seedlings per square metre (\$2.50 - \$5.50 per punnet). Total range per m <sup>2</sup> : \$54.60 - \$143.60 (average of \$99.10).                                                                                                                                                                                                                                   |
| <b>Method-crop category: Wick-mixed</b>   |                                                                                                                                                                                                                                                                                                                                                                                                                                                                                                                    |
| Details                                   | The combined average setup cost for wick-mixed areas was \$222.82 per square metre, as based on participant costing (Average of \$209.04/m <sup>2</sup> ) and the calculated retail cost of parts at \$291.70/m <sup>2</sup> .                                                                                                                                                                                                                                                                                     |
| Assump.                                   | The retail cost was based on publicly available instructions for building wicking beds as guided by the professional Australian gardener Costa (Link: <a href="https://www.sbs.com.au/shows/costa/listings/detail/i/1/article/6172/Wicking-Garden-Beds">https://www.sbs.com.au/shows/costa/listings/detail/i/1/article/6172/Wicking-Garden-Beds</a> ). The total reported cost to build the wicking bed and plant it out was \$875, making the per square metre cost \$291.70.                                     |
