# Supplementary material for: Productivity, resource efficiency and financial savings: An investigation of the current capabilities and potential of South Australian home food gardens
Source: PubMed Central journal article supplement (PMC7156066; doi:10.1371/journal.pone.0230232), 2020-04-14
Supplement: pone.0230232.s006.pdf [file pone.0230232.s006.pdf]

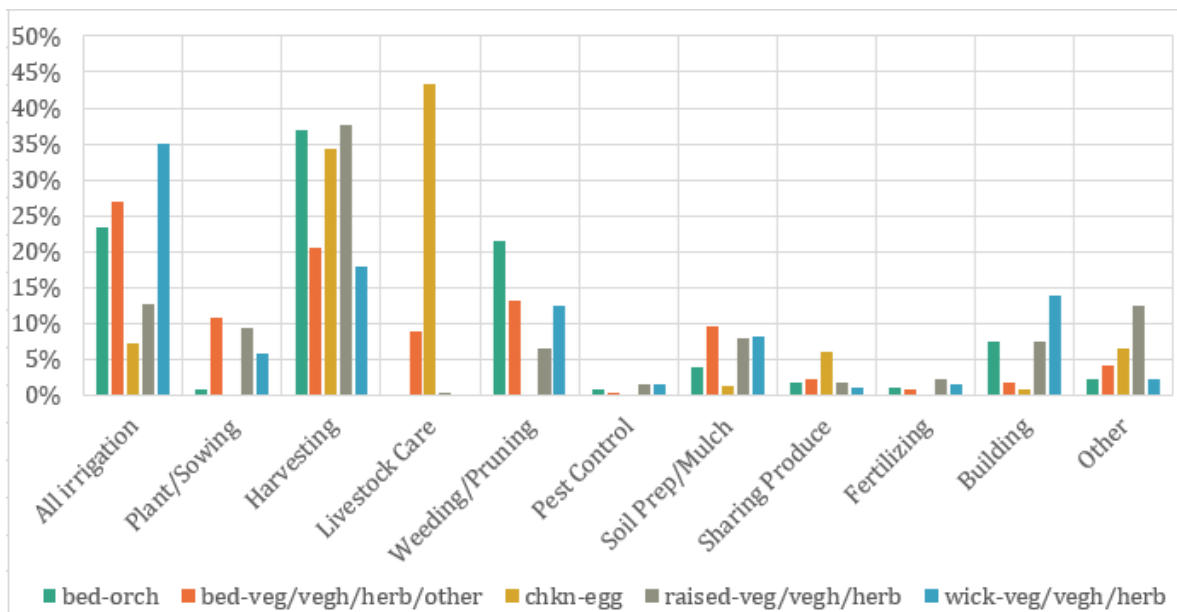

| Frequency of main activities |                        |       |        |               |                |
|------------------------------|------------------------|-------|--------|---------------|----------------|
|                              | Method-crop categories | Daily | Weekly | Every 3 weeks | Every 2 months |
| Irrigation                   | Bed-orch               | 23.1% | 39.8%  | 33.3%         | 3.7%           |
|                              | Bed-mixed              | 45.6% | 30.6%  | 11.9%         | 11.9%          |
|                              | Chkn-egg               | 30.5% | 34.4%  | 18.8%         | 16.4%          |
|                              | Raised-mixed           | 49.8% | 39.6%  | 8.7%          | 2.0%           |
|                              | Wick-mixed             | 23.2% | 43.4%  | 29.8%         | 3.5%           |
| Harvesting                   | Bed-orch               | 60.0% | 27.3%  | 8.5%          | 4.2%           |
|                              | Bed-mixed              | 59.3% | 31.7%  | 7.0%          | 2.0%           |
|                              | Chkn-egg               | 58.3% | 27.1%  | 10.8%         | 3.7%           |
|                              | Raised-mixed           | 54.6% | 32.2%  | 8.7%          | 4.5%           |
|                              | Wick-mixed             | 59.1% | 32.7%  | 6.8%          | 1.4%           |

Supplementary Figure 1. A comparison of the percentages of total time spent on different garden-related activities by the five main method-crop categories, and the frequency of the two dominant activities – irrigation and harvesting.
